# Supplementary material for: What Can We Learn from the Evolution of Protein-Ligand Interactions to Aid the Design of New Therapeutics?
Source: PLOS journal article supplement (doi:10.1371/journal.pone.0051742), 2012-12-11
Supplement: S12 (10.1371/journal.pone.0051742.s012) [file journal.pone.0051742.s012]

| Set                                           | Unique by Complex | Unique UniProt | Unique SCOP families |
|-----------------------------------------------|-------------------|----------------|----------------------|
| <b>Synthetic small molecules</b>              | 1,525<br>(1,206)  | 518<br>(385)   | 165<br>(143)         |
| <b>Approved drugs</b>                         | 201 (95)          | 155 (76)       | 67 (46)              |
| <b>Oral drugs</b>                             | 134 (68)          | 93 (49)        | 24 (19)              |
| <b>Protein-protein interaction inhibitors</b> | 30 (25)           | 9 (9)          | 7 (7)                |
| <b>Natural molecules</b>                      | 1505 (283)        | 1159 (216)     | 346 (134)            |
| <b>Small peptides</b>                         | 557 (467)         | 288 (238)      | 98 (83)              |
| <b>Obligate dimers</b>                        | 161               | 161            | 293                  |
| <b>Transient dimers</b>                       | 154               | 154            | 183                  |
| <b>Homo quaternary interfaces</b>             | 12,034            | 7,177          | 2,711                |
| <b>Hetero quaternary interfaces</b>           | 2,271             | 1,709          | 897                  |
| <b>Protein-protein complexes SM inhibited</b> | 15                | 15             | 13                   |

Supplementary Table S2. Number of entries in each set of molecules. The non-redundant sets are considering non-redundant set of interactions for the complexes (protein-ligand or protein-protein interaction). From these sets protein redundancy is removed by selecting unique UniProt identifiers and removed structural domains redundancy by selecting unique SCOP families. Numbers in parenthesis are the number of unique small molecules in each set. Numbers for unique UniProt and SCOP families for protein complexes refer to distinct pairs of UniProt identifiers or SCOP family respectively.
