# Supplementary material for: What Can We Learn from the Evolution of Protein-Ligand Interactions to Aid the Design of New Therapeutics?
Source: PLoS One. 2012 Dec 11;7(12):e51742. doi: 10.1371/journal.pone.0051742 (PMC3519888; doi:10.1371/journal.pone.0051742)
Supplement: Table S1 — Approved and oral small molecule drugs that engage more than 40% polar contacts with their bound protein. (PDF) [file pone.0051742.s011.pdf]

|                                                                                     | HetID<br>(PDB) | Ratio | alogP | Drug type                         | DrugBank ID                             |
|-------------------------------------------------------------------------------------|----------------|-------|-------|-----------------------------------|-----------------------------------------|
| 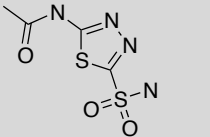   | AZM<br>(3HS4)  | 0.63  | -1.3  | Approved<br>oral                  | DB00819<br>Acetazolamide                |
| 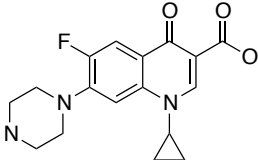   | CPF<br>(1T9U)  | 0.61  | -1.3  | Approved<br>oral                  | DB00537<br>Ciprofloxacin                |
| 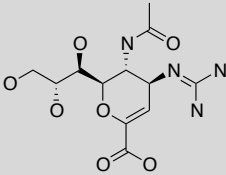   | ZMR<br>(2HTQ)  | 0.60  | -5.0  | Approved<br>inhalation            | DB00558<br>Zanamivir                    |
| 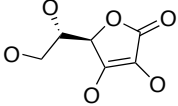   | ASC<br>(1F9G)  | 0.58  | -1.9  | Approved<br>nutraceutical<br>oral | DB00126<br>Ascorbic acid<br>(vitamin C) |
| 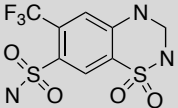 | HFZ<br>(3ILU)  | 0.53  | 0.0   | Approved<br>oral                  | DB00774<br>Hydro-<br>flumethiazide      |
| 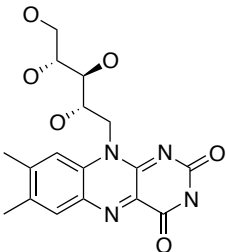 | RBF<br>(3DDY)  | 0.52  | 0.1   | Approved<br>nutraceutical<br>oral | DB00140<br>Riboflavin<br>(vitamin B2)   |
| 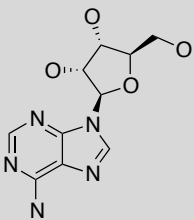 | AND<br>(1UAY)  | 0.48  | -1.9  | Approved<br>intravenous           | DB00640<br>Adenosine                    |
| 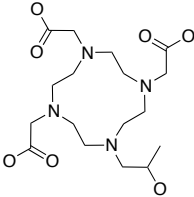 | DO3<br>(2QMI)  | 0.48  | -8.9  | Approved<br>intravenous           | DB00597<br>Gadoteridol                  |

|  | HetID<br>(PDB) | Ratio | alogP | Drug type                               | DrugBank ID                         |
|--|----------------|-------|-------|-----------------------------------------|-------------------------------------|
|  | FON<br>(3GEH)  | 0.46  | -5.0  | Experimental<br>Vitamin B<br>complex    | DB03256<br>Folinic acid             |
|  | CFX<br>(1I2W)  | 0.46  | -1.6  | Approved<br>antibiotic<br>intravenous   | DB01331<br>Cefoxitin                |
|  | AIC<br>(2RDD)  | 0.46  | -2.3  | Approved<br>oral<br>antibiotic          | DB00415<br>Ampicillin               |
|  | LFX<br>(3K9F)  | 0.44  | -1.4  | Approved<br>oral<br>antibacterial       | DB01137<br>Levofloxacin             |
|  | H4B<br>(2DTT)  | 0.43  | -1.1  | Approved<br>nutraceutical<br>oral       | DB00360<br>Tetrahydro-<br>biopterin |
|  | MER<br>(1H8Y)  | 0.42  | -4.9  | Approved<br>intravenous<br>antibiotic   | DB00760<br>Meropenem                |
|  | 2MN<br>(1W3R)  | 0.41  | -0.2  | Approved<br>oral                        | DB00916<br>Metronidazole            |
|  | T3<br>(2PIV)   | 0.41  | 1.5   | Approved<br>oral                        | DB00279<br>Liothyronine             |
|  | SRY<br>(3HAV)  | 0.40  | -7.7  | Approved<br>intramuscular<br>antibiotic | DB01082<br>Streptomycin             |
|  | FBI<br>(1HWL)  | 0.40  | 0.9   | Approved<br>oral                        | DB01098<br>Rosuvastatin             |

Supplementary Table S1. Approved and oral small molecule drugs that engage more than 40% polar contacts with their bound protein. HetID is the residue identifier for the ligand in the PDB. Ratio refers to the ratio of polar contacts as  $[\text{polar}/(\text{polar}+\text{apolar})]$ . In the chemical structure representation, all hydrogens are omitted.
